# Supplementary material
Source: PubMed Central journal article supplement (PMC9177711)
Supplement: NIHMS1789256-supplement-fS1.pdf [file NIHMS1789256-supplement-fS1.pdf]

## Supplemental Figure 1

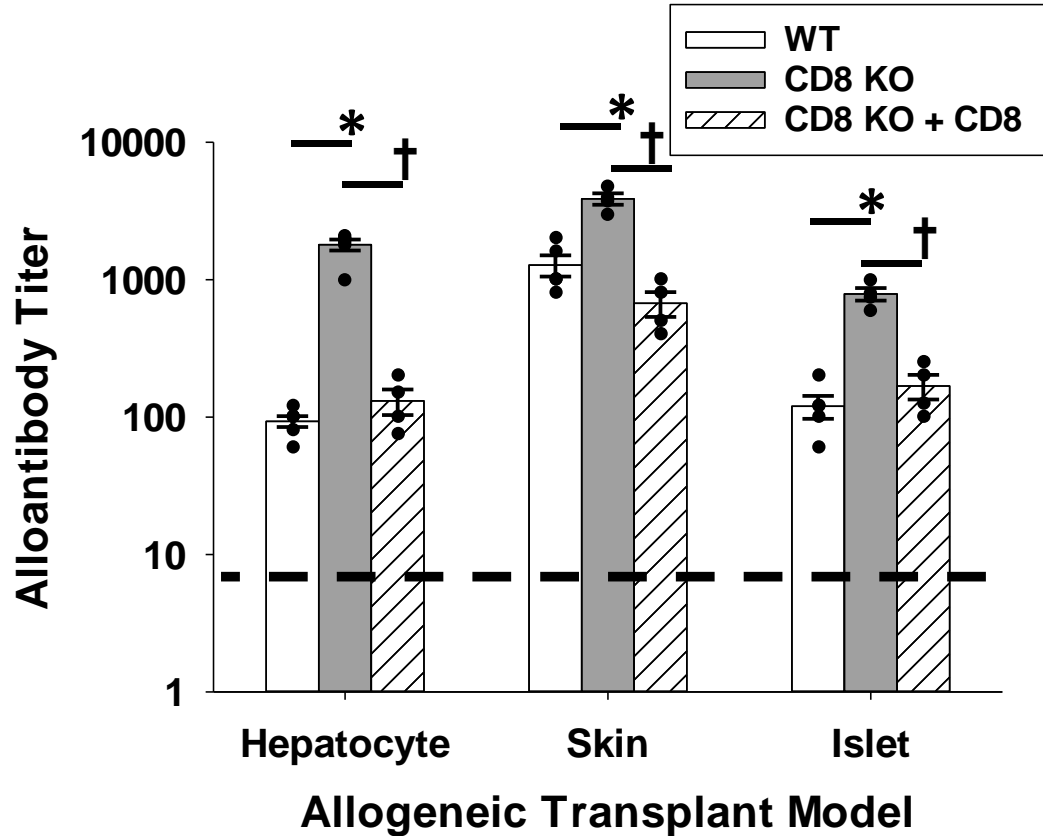

**Supplemental Figure 1. CD8<sup>+</sup> T cell dependent downregulation suppression of alloantibody production after Hc, skin, and islet transplant.** C57BL/6 (WT) and CD8 KO mice were transplanted with allogeneic Hc, skin, or islet (all FVB/N, H-2<sup>q</sup>). Some CD8 KO recipients received adoptive transfer (AT) of naive CD8<sup>+</sup> T cells (day 0). On day 14, serum was harvested and analyzed for alloantibody titer (mean±SE). CD8 KO recipients produce significantly higher alloantibody titer than WT recipients (\*p<0.001 for all transplant types; n=4 for all transplant types). AT of CD8<sup>+</sup> T cells significantly reduced alloantibody titer in all transplant models (†p<0.001 for all transplant types; n=4 for all transplant types). Dashed line represents naïve control sera.
