# Supplementary material
Source: PubMed Central journal article supplement (PMC9177711)
Supplement: NIHMS1789256-supplement-fS2.pdf [file NIHMS1789256-supplement-fS2.pdf]

### Supplemental Figure 2

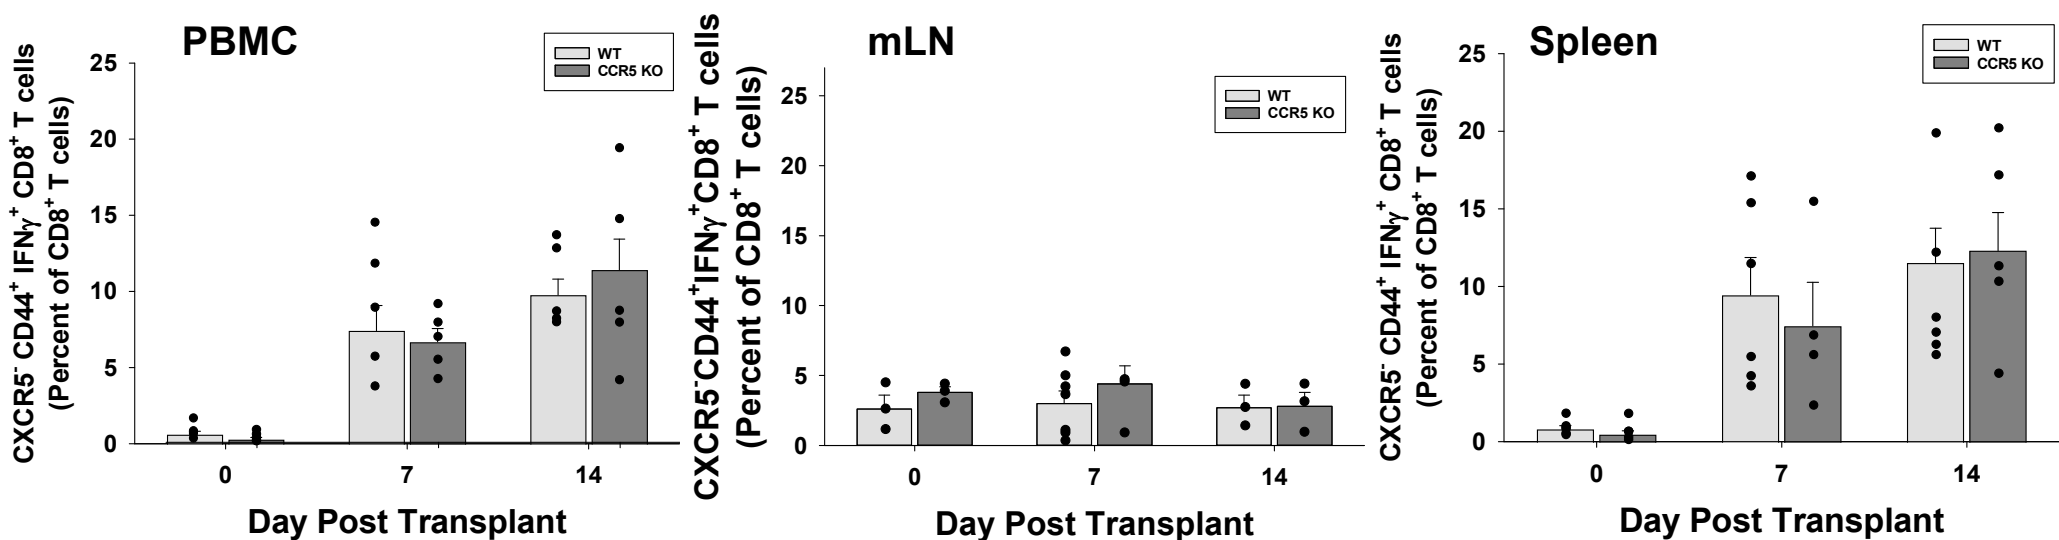

**Supplemental Figure 2. Proportion of CXCR5-CD44<sup>+</sup>IFN- $\gamma$ <sup>+</sup>CD8<sup>+</sup> T cells after kidney transplant is similar between CCR5 KO and WT recipients.** CCR5 KO and C57BL/6 (wild-type, WT; both H-2<sup>b</sup>) mice were transplanted with A/J (H-2<sup>a</sup>) kidney. Peripheral blood, mesenteric lymph node (mLN), and splenocytes were retrieved from cohorts of mice prior to transplant and on days 7 and 14 posttransplant. CD8<sup>+</sup> T cells were analyzed by flow cytometry. Flow cytometric gating was on lymphocytes, single cells, CD8<sup>+</sup> T cells, and CXCR5-negative cells. Fluorescent minus one was used as a negative control. CXCR5-CD44<sup>+</sup>IFN- $\gamma$ <sup>+</sup>CD8<sup>+</sup> T cells were similar between **A**) PBMC and **B**) mLN and **C**) splenocytes between CCR5 KO and WT recipients (p=ns).
