# Supplementary material
Source: PubMed Central journal article supplement (PMC9177711)
Supplement: NIHMS1789256-supplement-fS3.pdf [file NIHMS1789256-supplement-fS3.pdf]

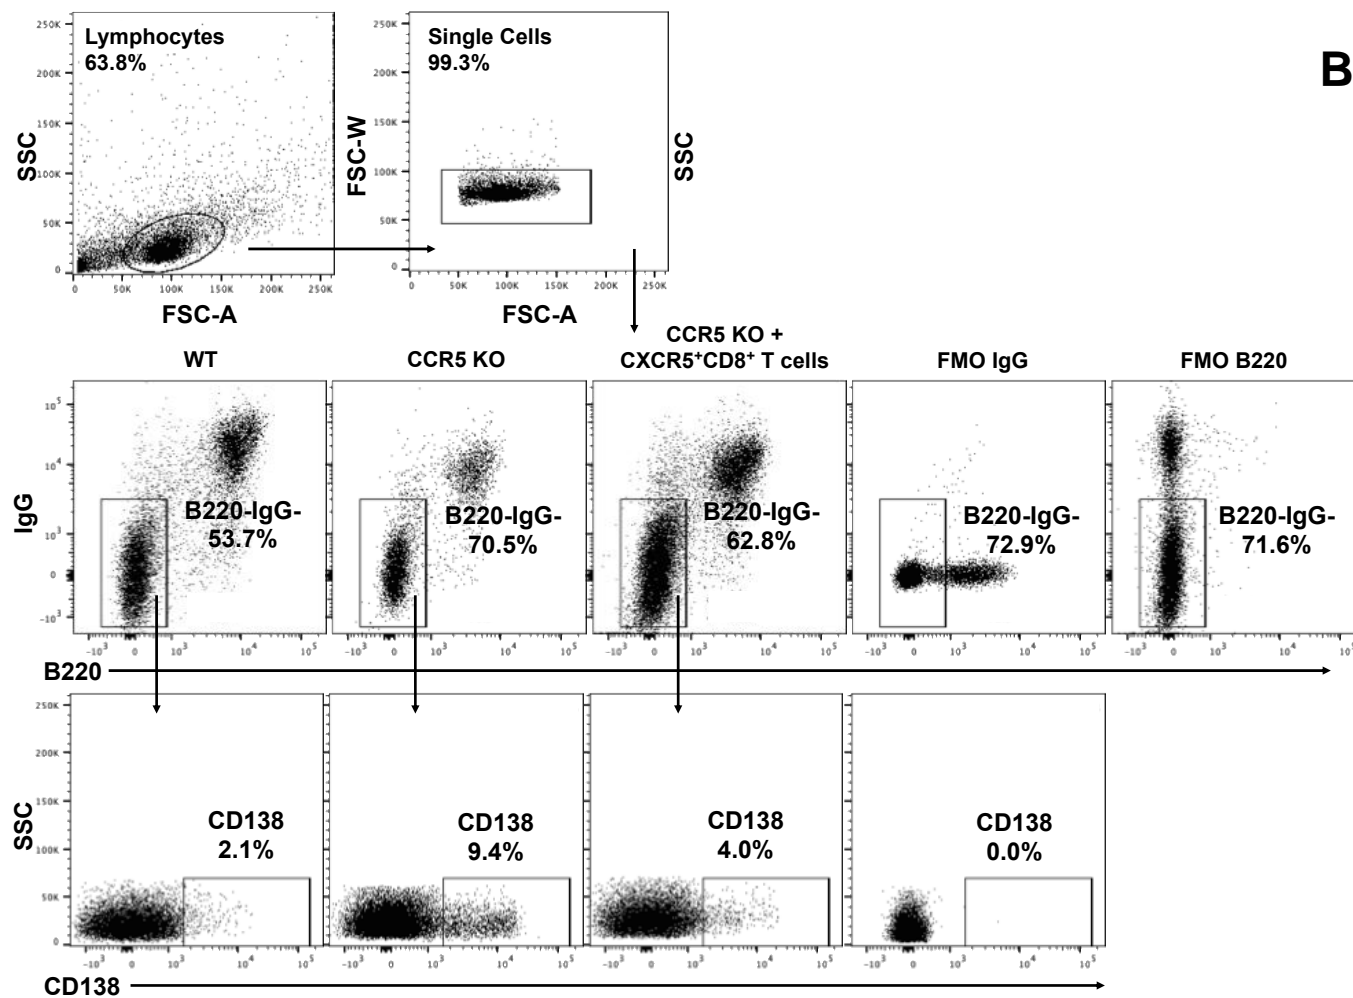

**Supplemental Figure 3. Adoptive cell transfer of alloprimed CXCR5<sup>+</sup>CD8<sup>+</sup> T cells into CCR5 KO kidney transplant recipients significantly reduces the proportion of splenic plasma cells.** C57BL/6 (WT) and CCR5 KO mice (both H-2<sup>b</sup>) were transplanted with A/J (H-2<sup>a</sup>) kidney. On posttransplant day 5, a cohort of CCR5 KO recipients underwent AT of 2x10<sup>6</sup> CXCR5<sup>+</sup>CD8<sup>+</sup> T cells. Splenocytes were retrieved for analysis of plasma cells (CD138<sup>+</sup>B220<sup>-</sup>IgG<sup>-</sup>) on day 14 posttransplant. **A)** Representative flow cytometric gating on lymphocytes, single cells, and B220<sup>-</sup>IgG<sup>-</sup> cells is shown. Fluorescent minus one was used as a negative control. **B)** The proportion of plasma cells (CD138<sup>+</sup>B220<sup>-</sup>IgG<sup>-</sup>) was significantly higher in CCR5 KO recipients (6.5±0.4%, n=3) compared to WT recipients (2.4±0.5%, n=4, \*p<0.0001) on day 7 posttransplant. Following ACT of 2.0x10<sup>6</sup> alloprimed CXCR5<sup>+</sup>CD8<sup>+</sup> T cells, the proportion of splenic plasma cells was significantly reduced in CCR5 KO recipients (2.5±0.3%, n=3; \*\*p<0.0001).
